# Supplementary material
Source: publisher figshare collection journal article supplement (https://acs.figshare.com/ndownloader/files/9920461)
Supplement: Supplementary file 1 [file 9920461]

# Supporting Information

## A Pumpless Acoustofluidic Platform for Size-Selective Concentration and Separation of Microparticles

Husnain Ahmed, Ghulam Destgeer, Jinsoo Park, Jin Ho Jung, Raheel Ahmad,  
Kwangseok Park and Hyung Jin Sung\*

Department of Mechanical Engineering, KAIST, Daejeon 34141, Korea. E-mail: hjsung@kaist.ac.kr

### TABLE OF CONTENTS

**Figure S1:** Characterization of the particle concentration inside the microchannel for the initial sample concentrations of 200 particles/ $\mu\text{L}$ .

**Figure S2:** Characterization of the particle concentration inside the microchannel for the initial sample concentrations of 100 particles/ $\mu\text{L}$ .

**Figure S3:** Characterization of the particle concentration inside the microchannel for the initial sample concentrations of 20 particles/ $\mu\text{L}$ .

**Figure S4:** Characterization of the particle concentration inside the microchannel for the initial sample concentrations of 10 particles/ $\mu\text{L}$ .

**Figure S5:** Characterization of the particle concentration inside the microchannel for the initial sample concentrations of 1 particle/ $\mu\text{L}$ .

**Figure S6:** Experimental image showing the concentrations of different sized particles inside the microchannel.

**Figure S7:** Experimental setup for the naked eye view of the particle separation and sample collection from the outlet for further analysis.

**Video S1:** Concentration of particles by TSAWs.

**Video S2:** Highly sensitive SAW for particles trapping from the extremely low initial sample concentration.

**Video S3:** Size-selective concentration and separation of particles.

**Video S4:** Naked eye view of the trapping, concentration, washing and release.

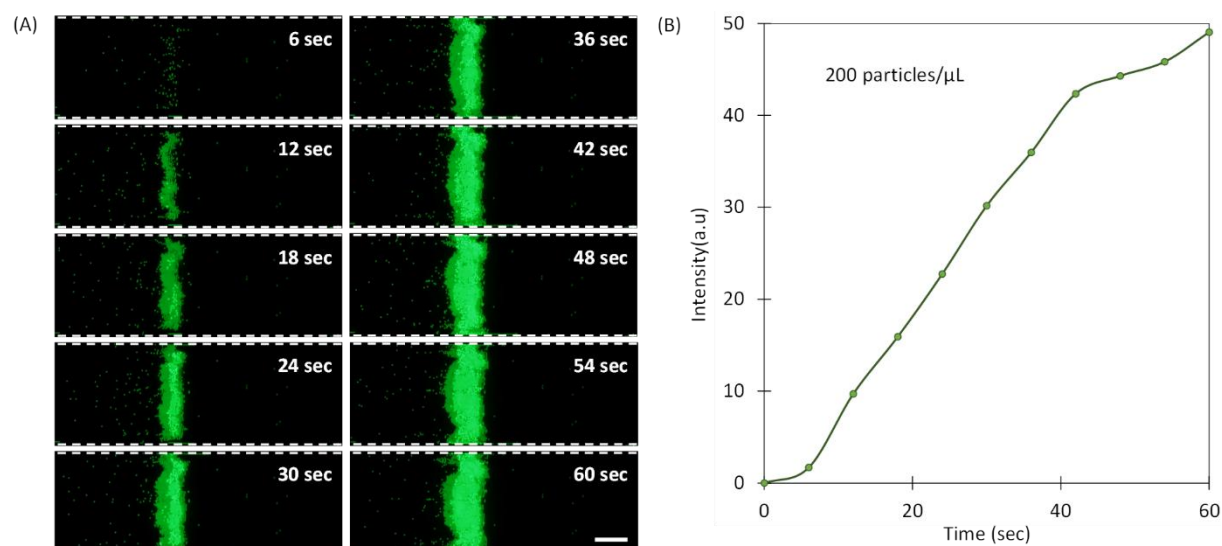

**Figure S1.** Characterization of the particle concentration inside the microchannel. The initial concentration of the sample solution was 200 particles/ $\mu\text{L}$ . (a) Experimental images of the microchannel and (b) graph showing the linear increase in the particle concentration from 6 to 60 s. Scale bar: 250  $\mu\text{m}$ .

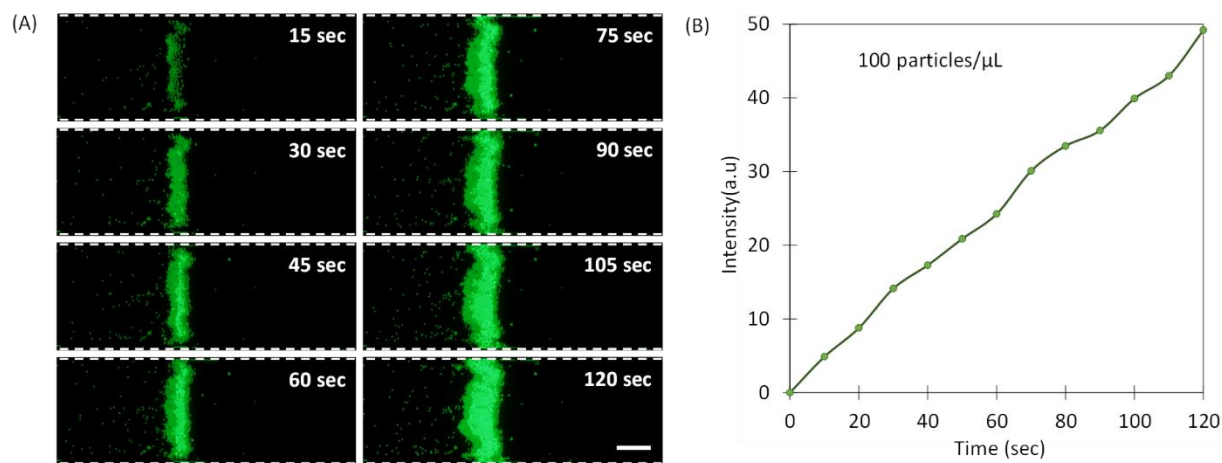

**Figure S2.** Characterization of the particle concentration inside the microchannel. The initial concentration of the sample solution was 100 particles/ $\mu\text{L}$ . (a) Experimental images of the microchannel and (b) graph showing the linear increase in the particle concentration from 15 to 120 s. Scale bar: 250  $\mu\text{m}$ .

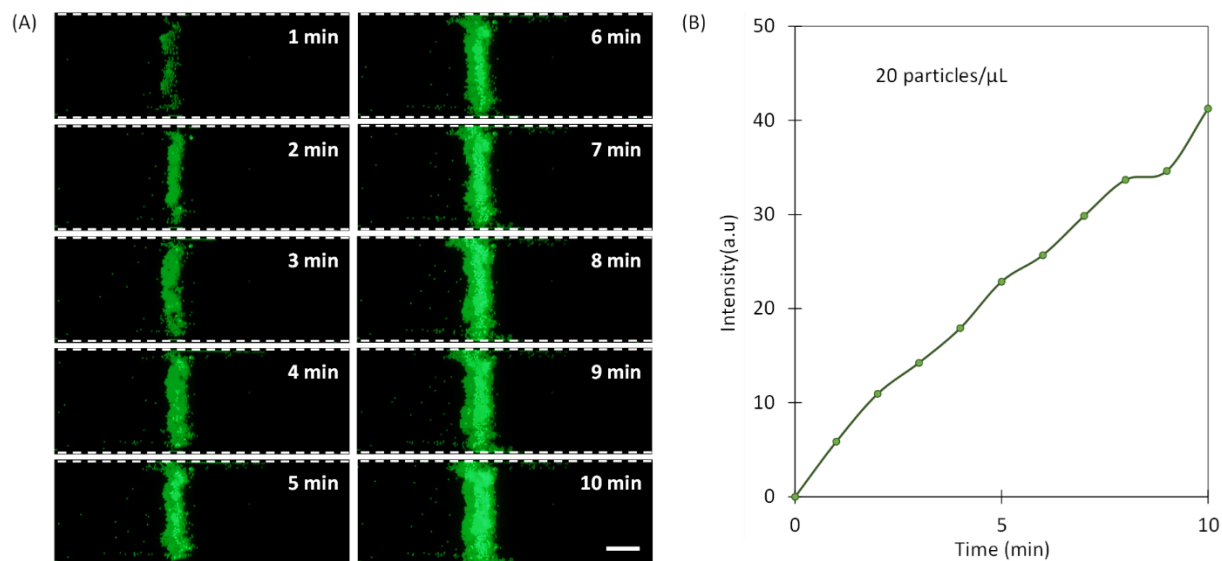

**Figure S3.** Characterization of the particle concentration inside the microchannel. The initial concentration of the sample solution was 20 particles/ $\mu\text{L}$ . (a) Experimental images of the microchannel and (b) graph showing the linear increase in the particle concentration from 1 to 10 min. Scale bar: 250  $\mu\text{m}$ .

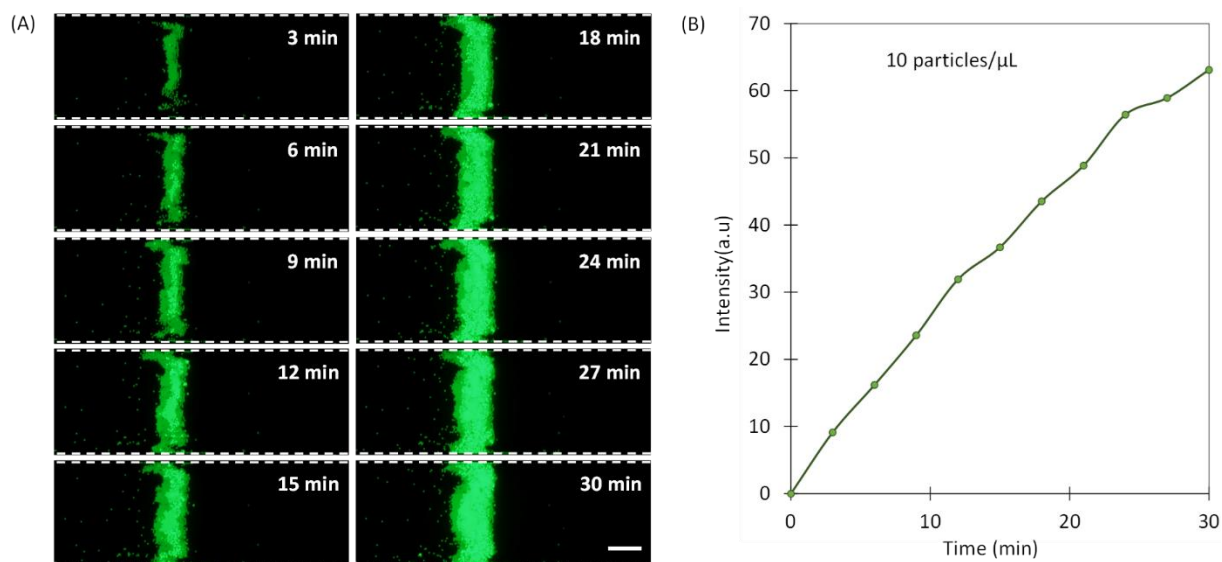

**Figure S4.** Characterization of the particle concentration inside the microchannel. The initial concentration of the sample solution was 10 particles/ $\mu\text{L}$ . (a) Experimental images of the microchannel and (b) graph showing the linear increase in the particle concentration from 3 to 30 min. Scale bar: 250  $\mu\text{m}$ .

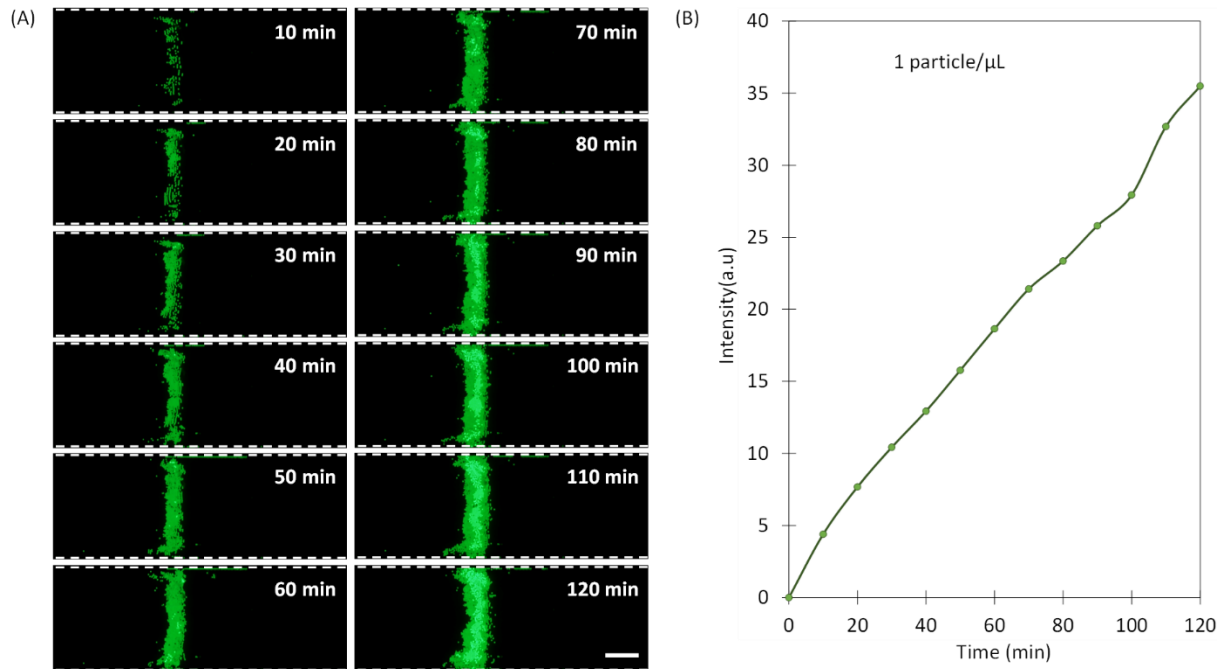

**Figure S5.** Characterization of the particle concentration inside the microchannel. The initial concentration of the sample solution was 1 particle/ $\mu\text{L}$ . (a) Experimental images of the microchannel and (b) graph showing the linear increase in the particle concentration from 10 to 120 min. Scale bar: 250  $\mu\text{m}$ .

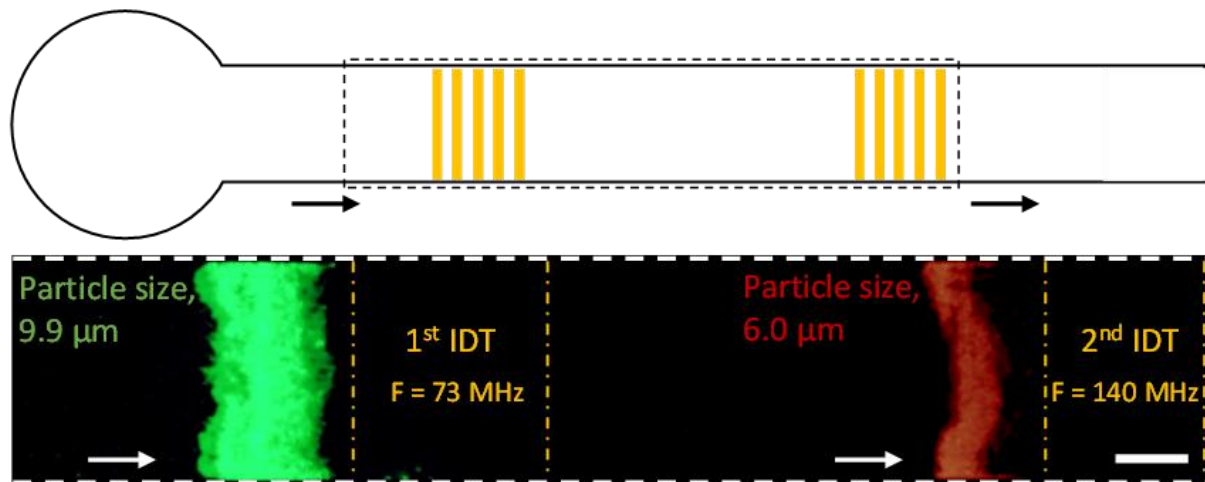

**Figure S6.** Experimental image of the microchannel showing the concentrations of 9.9 and 6.0  $\mu\text{m}$  particles alongside the specific IDTs. Scale bar: 250  $\mu\text{m}$ .

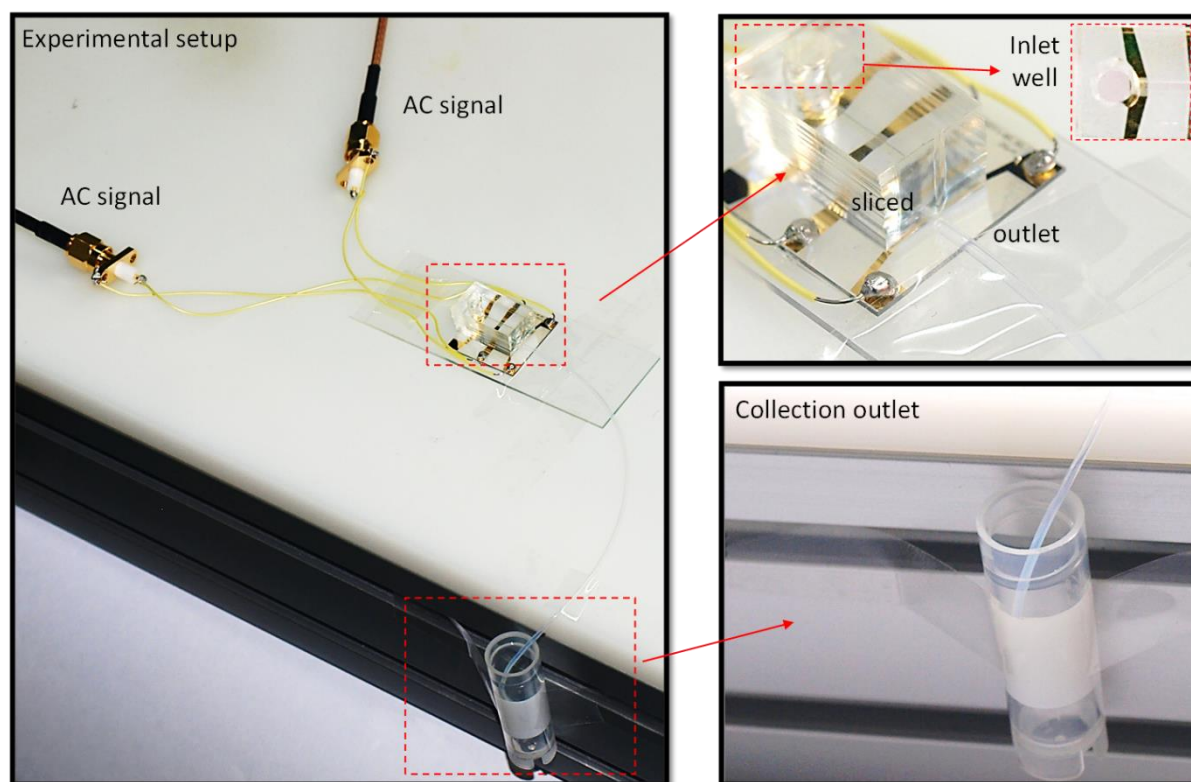

**Figure S7.** Experimental setup for the naked eye view of the particle separation and sample collection from the outlet for further analysis.
